# Supplementary material for: Altered drug susceptibility during host adaptation of a Plasmodium falciparum strain in a non-human primate model
Source: PubMed Central journal article supplement (PMC4754742; doi:10.1038/srep21216), 2016-02-16

TABLE S1. Lineage, parasitological, treatment, genotyping and antimalarial resistance profile of *Plasmodium falciparum* C2A in *Aotus* monkeys

| Passage Level | ID          | Inoculation Date | Donor | Inoculum Preservative description | Inoculation route | Inoculum Size         | Day of Patency | Peak Asexual Parasitemia x uL x 10 <sup>3</sup> | Day of Peak | Day of primary Treatment | Primary treatment administration route | Day of Clearance | Days to clear from end of primary treatment | Primary treatment disposition | Day of Recrudescence | Day of Retreatment | Final Disposition | Treatment regimen (mg per kg/day:Day Pt)                      | Production of Gametocytes Yes or No | Gametocyte day of patency | Gametocyte Peak x 10 <sup>3</sup> | Gametocyte Pt Day of Peak | Gametocyte day of clearance | Gametocyte day of recrudescence |  |
|---------------|-------------|------------------|-------|-----------------------------------|-------------------|-----------------------|----------------|-------------------------------------------------|-------------|--------------------------|----------------------------------------|------------------|---------------------------------------------|-------------------------------|----------------------|--------------------|-------------------|---------------------------------------------------------------|-------------------------------------|---------------------------|-----------------------------------|---------------------------|-----------------------------|---------------------------------|--|
| I             | TM92CA-WR9R |                  |       |                                   |                   |                       |                |                                                 |             |                          |                                        |                  |                                             |                               |                      |                    |                   |                                                               |                                     |                           |                                   |                           |                             |                                 |  |
| I             | 89005       | 12/14/98         |       | Culture                           | IP                | nd                    | 73             | 10.50                                           | 84          |                          |                                        | 90               |                                             |                               |                      |                    | self-cured        | None                                                          | Yes                                 | 77                        | 0.01                              | 77                        | 106                         |                                 |  |
| II            | 92015       | 2/26/99          | 89005 | Citrate                           | IV                | >10                   | 2              | 20.12                                           | 22          | 73                       | Oral                                   | 93               | 20                                          | cured                         |                      |                    | cured             | MQ (40/3:73)                                                  | Yes                                 | 6                         | 260                               | 82                        | 7, 22, 33, 93               | 16, 24, 74                      |  |
| III           | 92034       | 5/7/99           | 92015 | Citrate                           | IV                | 18120                 | 1              | 85.12                                           | 11          | 11                       | Oral                                   | 55               | 43                                          | failed                        | 95                   |                    | self-cured        | MQ (20/1:11)                                                  | Yes                                 | 5                         | >0.01                             | 14                        | 7, 43                       | 12                              |  |
| III           | 24058       | 11/24/09         | 92015 | Glycerol-EDTA                     | IP                | 42280                 | 19             | 56.43                                           | 27          | 27                       | Oral/IV                                | 31               | 2                                           | cured                         |                      |                    | cured             | MQ (40/1:27), AS_IV (30/3:27)                                 | Yes                                 | 27                        | >0.01                             | 29                        | 30                          |                                 |  |
| III           | 24058       | 11/24/09         | 92015 | Glycerol-EDTA                     | IP                | 42280                 |                |                                                 |             |                          |                                        |                  |                                             |                               |                      |                    |                   |                                                               |                                     |                           |                                   |                           |                             |                                 |  |
| IV            | 93014       | 8/12/99          | 92034 | Citrate                           | IV                | >10                   | 3              | 121.50                                          | 8           | 8                        |                                        | 41               | 30                                          | failed                        |                      | 22, 42             | died              | ART (8/3:8)/(16/3:22), QN (20/2:43)                           | Yes                                 | 15                        | 0.01                              | 15                        | 19, 21, 34, 37              | 20, 27, 36                      |  |
| IV            | 26008       | 12/21/09         | 24058 | RPMI                              | IV                | 5.0 x 10 <sup>6</sup> | 1              | 50.27                                           | 8           | 9                        | Oral/IV                                | 13               | 2                                           | cured                         |                      |                    | self-cured        | MQ (40/1:9), AS_IV (33/3:9)                                   | Yes                                 | 9                         | >0.01                             | 9                         | 11                          |                                 |  |
| IV            | 26048A      | 12/21/09         | 24058 | RPMI                              | IV                | 5.0 x 10 <sup>6</sup> | 1              | 0.35                                            | 4           |                          |                                        | 8                |                                             |                               |                      |                    | self-cured        | None                                                          | No                                  |                           |                                   |                           |                             |                                 |  |
| V             | 12801       | 5/2/02           | 93014 | Glycerol-EDTA                     | IP                | 121500                | 7              | 113.52                                          | 25          | 26                       | Oral                                   |                  |                                             |                               |                      | 33, 46, 48         | died              | MQ (20/1:26), QN (20/3:33), QN (20/2:40), P226 (40/3:48)      | No                                  |                           |                                   |                           |                             |                                 |  |
| VI            | 12907       | 5/24/02          | 12801 | Citrate                           | IV                | 4860                  | 2              | 121.50                                          | 11          | 14                       | Oral                                   | 39               | 20                                          | failed                        |                      | 26, 38             | cured             | QN (20/5:14), P526 (20/3:26), MQ (40/1:38)                    | No                                  |                           |                                   |                           |                             |                                 |  |
| VII           | 12804       | 6/7/02           | 12907 | Citrate                           | IV                | 23500                 | 1              | 72.42                                           | 6           | 11                       | Oral                                   |                  |                                             |                               |                      | 12                 |                   | QN (20/1:11), P526 (10/3:12)                                  | No                                  |                           |                                   |                           |                             |                                 |  |
| VIII          | 13112       | 6/18/02          | 12804 | Citrate                           | IV                | 27750                 | 1              | 87.75                                           | 6           | 7                        | Oral                                   |                  |                                             | failed                        |                      | 13                 | died              | WR283178/40/3:7), MQ (40/1:13)                                | No                                  |                           |                                   |                           |                             |                                 |  |
| VIII          | 12753       | 7/13/07          | 12907 | Glycerolate                       | IV                | 121510                | 15             | 6.59                                            | 21          | 21                       | Oral                                   | 28               | 7                                           | failed                        | 70                   | 26, 81             | cured             | MQ (40/1:21), AS_IV (20/3:26), MQ (40/1:81)/AS (8/3:81)       | No                                  |                           |                                   |                           |                             |                                 |  |
| VIII          | 90025       | 8/3/07           | 12753 | Citrate                           | IV                | 6590                  | 2              | 1.13                                            | 7           | 60                       | Oral                                   | 17               |                                             |                               |                      |                    | cured             | MQ (40/1:60), AS/8/3:60)                                      | No                                  |                           |                                   |                           |                             |                                 |  |
| VIII          | 24049       | 4/17/08          | 12753 | Glycerolate                       | IV                | 6590                  | 4              | 266.76                                          | 12          | 12                       | IV                                     | 24               | 10                                          | failed                        | 45                   | 21, 69             | cured             | AS_IV (20/3:12), MAL (25/3:21), AS_IV (20/3:69), MQ (40/1:69) | No                                  |                           |                                   |                           |                             |                                 |  |
| IX            | 26006       | 4/7/09           | 24049 | Glycerolate                       | IV                | 266,760               |                | 115.25                                          | 7           | 8                        | Oral/IV                                | 19               | 9                                           | failed                        | 14                   | 17                 | cured             | MQ (40/1:8), AS_IV (20/3:8), MQ (40/1:17), AS_IV (20/3:17)    | No                                  |                           |                                   |                           |                             |                                 |  |
| X             | 26058       | 4/15/09          | 26006 | RPMI                              | IV                | 5.0 x 10 <sup>6</sup> | 2              | 104.31                                          | 11          | 11                       | Oral                                   | 28               | 17                                          | failed                        | 20                   | 27                 | cured             | MQ(40/1:11), AS_IV(20/3:27), MQ(40/2:29)                      | No                                  |                           |                                   |                           |                             |                                 |  |
| X             | 26033       | 4/15/09          | 26006 | RPMI                              | IV                | 5.0 x 10 <sup>6</sup> | 2              | 272.74                                          | 9           | 9                        | Oral                                   | 23               | 14                                          | failed                        |                      | 16                 | cured             | MQ(40/1:9), AS(33/3:16)                                       | No                                  |                           |                                   |                           |                             |                                 |  |
| X             | 26028       | 4/15/09          | 26006 | RPMI                              | IV                | 5.0 x 10 <sup>6</sup> | 1              | 449.73                                          | 9           | 9                        | Oral                                   | 23               | 12                                          | failed                        |                      | 21                 | cured             | AS(33/3:9), AS_IV(20/3:21), MQ(40/1:23)                       | No                                  |                           |                                   |                           |                             |                                 |  |
| X             | 26045       | 4/15/09          | 26006 | RPMI                              | IV                | 5.0 x 10 <sup>6</sup> | 2              | 110.58                                          | 11          | 11                       | Oral                                   | 23               | 12                                          | failed                        |                      | 21                 | cured             | AS(33/3:11), AS_IV(20/3:21), MQ (40/1:23)                     | No                                  |                           |                                   |                           |                             |                                 |  |
| X             | 26063       | 4/15/09          | 26006 | RPMI                              | IV                | 5.0 x 10 <sup>6</sup> | 2              | 177.84                                          | 9           | 9                        | Oral                                   | 28               | 17                                          | failed                        |                      | 27                 | cured             | MQ (40/1:9), AS (33/3:9), AS_IV (20/3:27), MQ (40/1:29)       | No                                  |                           |                                   |                           |                             |                                 |  |
| X             | 26025       | 4/15/09          | 26006 | RPMI                              | IV                | 5.0 x 10 <sup>6</sup> | 2              | 106.02                                          | 10          | 10                       | Oral                                   | 24               | 12                                          | failed                        | 20                   |                    | cured             | MQ(40/1:10), AS(33/3:12), MQ (40/1:29)                        | No                                  |                           |                                   |                           |                             |                                 |  |
| X             | 23042A      | 4/15/09          | 26006 | RPMI                              | IV                | 5.0 x 10 <sup>6</sup> | 2              | 0.34                                            | 17          | 16                       | Oral                                   | 18               | -1                                          | cured                         |                      |                    | cured             | AS(33/3:16), MQ(40/1:18)                                      | No                                  |                           |                                   |                           |                             |                                 |  |
| MIN           |             |                  |       |                                   |                   |                       | 1              | 0.34                                            | 4           | 7                        |                                        | 8                | -1                                          |                               |                      |                    |                   |                                                               |                                     | 5                         |                                   |                           |                             | 9                               |  |
| Q1            |             |                  |       |                                   |                   |                       | 1              | 17.715                                          | 7.75        | 9                        |                                        | 19               | 7.5                                         |                               |                      |                    |                   |                                                               |                                     | 5.75                      |                                   |                           |                             | 12.75                           |  |
| Median        |             |                  |       |                                   |                   |                       | 2              | 96.03                                           | 10.5        | 11                       |                                        | 24               | 12                                          |                               |                      |                    |                   |                                                               |                                     | 12                        |                                   |                           |                             | 22                              |  |
| Q3            |             |                  |       |                                   |                   |                       | 3.5            | 121.5                                           | 18          | 19.75                    |                                        | 39               | 19.25                                       |                               |                      |                    |                   |                                                               |                                     | 39.5                      |                                   |                           |                             | 78.25                           |  |
| MAX           |             |                  |       |                                   |                   |                       | 73             | 449.73                                          | 84          | 73                       |                                        | 93               | 43                                          |                               |                      |                    |                   |                                                               |                                     | 77                        |                                   |                           |                             | 82                              |  |

λ = Spleen intact  
 \* = Repeat  
 \*\* = PfPR

## Primer sequences

*MDR1-T1F* 5'-TATGCATTTGTGGGAGAATCAG-3'

*MDR1-T1R* 5'-CTCCTTCGGTTGGATCATAAAG-3'

*LDH-T1F* 5'-AGGACAATATGGACACTCCGAT-3' and

*LDH-T1R* 5'-TTTCAGCTATGGCTTCATCAA-3'

1F: 5'-ATGGAAGGAGAAAAAGTAAAAACAAAAGCAAATAG-3'

2F: 5'-GGTAGGTGATTTAAGAATTACATTTATTAATTGGT-3'; 3F: 5'-

CATTCCCATTAGTATTTTGTATAGGTG-3'

1R: 5'-TTATATATTTGCTATTAACCGGAGTGACCAAATCTG-3'

1R': 5'-TTA TAT ATT TGC TAT TAA AAC GGA GTG-3'

2R: 5'-AGCCTTATAATCATAGTTATTACCACCAAAAACG-3'

3R: 5'-TGTTGGTATTCATAATTGATGGAGAATTC-3'

*PFB0075c-F* 5'-GGGCGGCCGCATGAAAATATGAGAAGTTTAAAG-3'

*PFB0075c-R* 5'-CCGCTAGCACTAGTGAATATAATAAAAATTACGATGGAGAA-3'

*PF11710w-F* 5'-CCTGAACACTTGAAAATGGAAA-3'

*PF11710w-R* 5'-AAACGAAAAGATTGAAATGGA-3'

*PF11755c-F* 5'-ACCTGATCCTAGTGTACCCTCTCT-3'

*PF11755c-R* 5'-GAAGAACTTGTACTTGGTTTAGCCG-3'

*PF11780w-F* 5'-AAAACACTAGTATGTTTTTATGTAGGTTATGAG-3'

*PF11780w-R* 5'-AAACTTAAGCTCTCAGATTCATGTACATAAC-3'

**Table S3.** Average parasite day of clearance of *Plasmodium falciparum* infections in splenectomized or spleen intact Aotus monkeys after treatment with mefloquine and artesunate alone or in combination

| Aotus infection groups                                 |                         |           |           |                 |                 |
|--------------------------------------------------------|-------------------------|-----------|-----------|-----------------|-----------------|
| <i>P. falciparum</i> strain                            | C2A                     | C2A       | C2A       | C2A             | C2A             |
| Passage level                                          | III-IV                  | X         | X         | X               | X               |
| Splenectomized                                         | <i>y</i>                | <i>y</i>  | <i>y</i>  | <i>y</i>        | <i>n</i>        |
| Treatment regimens                                     |                         |           |           |                 |                 |
| Drug                                                   | AS / MQ                 | MQ        | AS        | AS / MQ         | AS / MQ         |
| mg/Kg x (days)                                         | 33 (3) / 40 (1)         | 40 (1)    | 33 (3)    | 33 (3) / 40 (1) | 33 (3) / 40 (1) |
| Route                                                  | <i>i.v.</i> / <i>po</i> | <i>po</i> | <i>po</i> | <i>po</i>       | <i>po</i>       |
| Treatment outcome (individual Aotus day of clearance*) |                         |           |           |                 |                 |
|                                                        | 5                       | 15**      | 15**      | 15              | 3               |
|                                                        | 5                       | 17**      | 13**      | 20**            | -               |
|                                                        | -                       | -         | -         | -               | -               |
| Average                                                | 5                       | 16        | 14        | 17.5            | 3               |

\* = day after initiation of treatment

\*\* = did not clear with primary treatment

AS = artesunate

*i.v.* = intravenously

*nd* = not determine

MQ = mefloquine

*po* = *per os* (orally)

*y* = yes; *n* = no

# Genomic analysis of chromosomes 2 and 9

## Chromosome 2

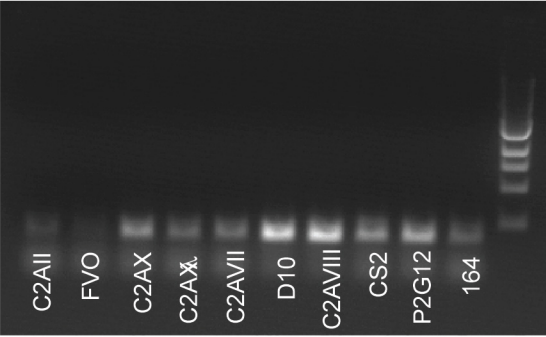

PFB0075c (Hyp9)

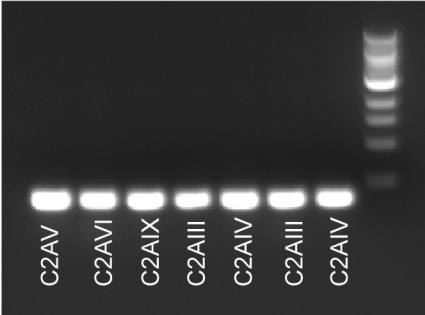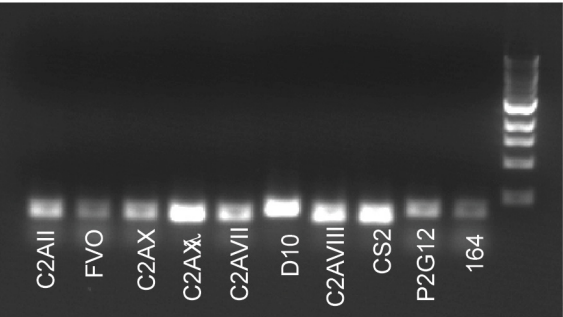

PFB0100c (KAHRP)

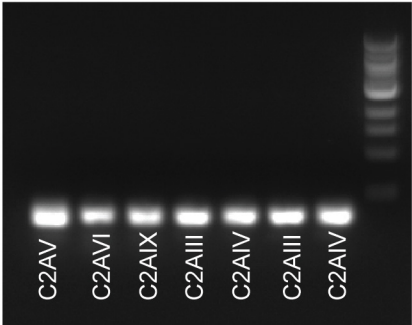

## Chromosome 9

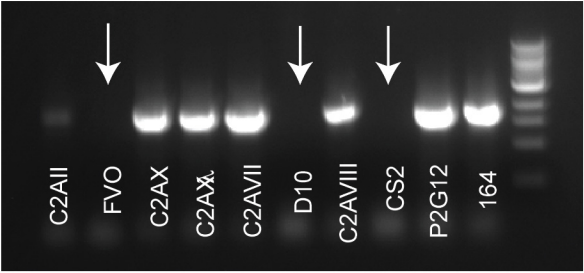

PFI1710w (GDV1)

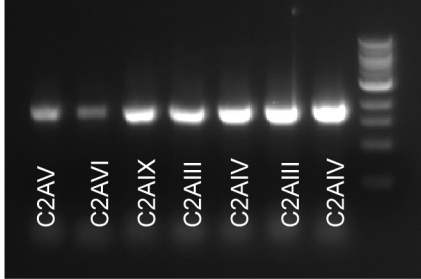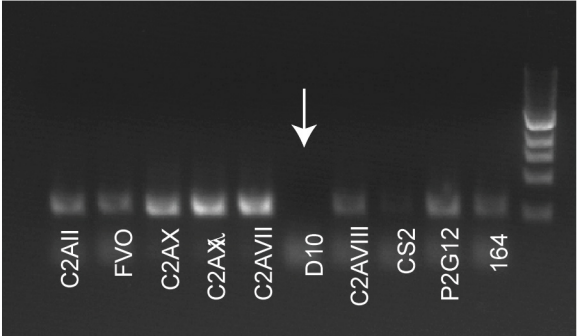

PFI1755c (Rex3)

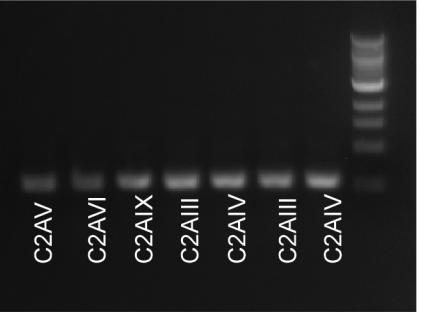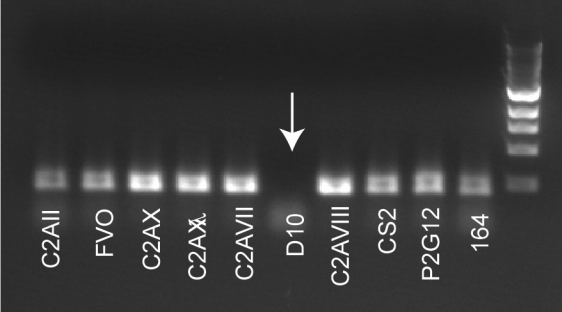

PFI1780w (PHISTc)

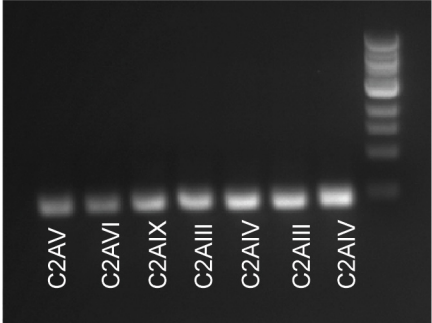

Supplement: srep21216-s1.pdf [file srep21216-s1.pdf]
